# Supplementary material
Source: Research Square preprint supplement (doi:10.21203/rs.3.rs-9028932/v1)
Supplement: Supplementary file 1 [file c97a7152006ba584b7649c3b.docx]

Supporting Information

**Synergistic upcycling of sewage sludge and rice straw into magnetic biochar for enhanced Sb(V) removal: Adsorption performance and mechanisms**

Yun Zhang, Min Yao*,Yubo Liu, Huasheng Gao

*School of Civil & Environmental Engineering and Geography Science, Ningbo University, Ningbo, 315211, China*

*Corresponding author.

Email: yaomin@nbu.edu.cn (Min Yao)

NUMBER OF PAGES:7

NUMBER OF FIGURES:0

NUMBER OF TABLES:1

**Table S1** Chemical formula,CAS Registry Number, Suppliers and Mass Fraction Purity of the Chemicals

| **Component** | **Chemical formula** | **CAS Reg. No.** | **Suppliers** | **Mass fractions purities** |
| --- | --- | --- | --- | --- |
| ferric chloride | FeCl3 | 7705-08-0 | National Group Chemical Reagent Co., Ltd | ≥0.990 |
| ferrous sulfate heptahydrate | FeSO4·7H2O | 7782-63-0 | National Group Chemical Reagent Co., Ltd | ≥0.990 |
| potassium bicarbonate | KHCO3 | 298-14-6 | National Group Chemical Reagent Co., Ltd | ≥0.990 |
| hydrochloric acid | HCl | 7647-01-0 | National Group Chemical Reagent Co., Ltd | ≥0.990 |
| sodium hydroxide | NaOH | 1310-73-2 | National Group Chemical Reagent Co., Ltd | ≥0.990 |
| sodium nitrate | NaNO3 | 7631-99-4 | National Group Chemical Reagent Co., Ltd | ≥0.990 |
| sodium sulfate | Na2SO4 | 7757-82-6 | National Group Chemical Reagent Co., Ltd | ≥0.990 |
| sodium chloride | NaCl | 7647-14-5 | National Group Chemical Reagent Co., Ltd | ≥0.990 |
| magnesium chloride | MgCl2 | 7786-30-3 | National Group Chemical Reagent Co., Ltd | ≥0.990 |
| calcium chloride | CaCl2 | 10043-52-4 | National Group Chemical Reagent Co., Ltd | ≥0.990 |
| dipotassium hydrogen phosphate | KH2PO4 | 7778-77-0 | National Group Chemical Reagent Co., Ltd | ≥0.990 |
| potassium chloride | KCl | 7447-40-7 | National Group Chemical Reagent Co., Ltd | ≥0.990 |
| humic acid | HA | 308067-45-0 | National Group Chemical Reagent Co., Ltd | ≥0.990 |
| potassium pyroantimonate | KSb(OH)6 | 12208-13-8 | National Group Chemical Reagent Co., Ltd | ≥0.990 |
| RR3 | C25H15ClN7O10S3·3Na | 23211-10-7 | a specialized textile printing and dyeing company in Ningbo | ≥0.900 |
| DO13 | C22H16N4O | 6253-10-7 | a specialized textile printing and dyeing company in Ningbo | ≥0.900 |

**Text S1 Materials Synthesis.**

**Preparation of alkali-activated biochar.** Biomass originated from municipal sludge (S) and rice straw (R) was employed as raw materials to synthesize biochar. The above biomass was first crushed to 2 mm, washed with deionized water and then dried in an oven for 24 h at 65 °C. The dried sludge, corn stalk and rice straw powder were then mixed in a certain mass ratio, totaling 5 g. The biomass mixtures were subsequently mixed with 6 g of potassium bicarbonate and dissolved in 50 mL of deionized water. After stirring for 24 hours in a magnetic stirrer, they were dried in an oven at 60 °C to obtain the biochar precursors. Then, the porous activated biochar (BC) samples were acquired by pyrolyzing the precursors for 2 h at 500 °C in a muffle furnace (SXL-1216, Shanghai Jinghong Experimental Equipment Co., Ltd., China) under nitrogen conditions. Upon cooling to ambient temperature, the samples were rinsed with a 0.1 mol/L HCl solution, subsequently undergoing repeated washings with deionized water until neutrality was achieved. These samples were finally dried at 60 °C and ground to 0.074 mm to produce various alkali-activated biochars, designated as SBC (municipal sludge biochar), RBC (rice straw biochar), S:R (1:1)-BC (municipal sludge and rice stalk with a mass ratio of 1:1), and S:R (4:1)-BC (municipal sludge and rice stalk with a mass ratio of 4:1).

**Text S2 Batch adsorption experiments.**

A stock solution of Sb(V) with a concentration of 100 mg/L was prepared by dissolving potassium pyroantimonate in deionized water. It was stored at 4 °C in a refrigerator. A working solution of 1 mg/L was subsequently prepared for use in experiments, with the exception of those aimed at investigating the effect of varying initial Sb(V) concentrations.

Prior to the batch experiments, pre-screening experiments were conducted to evaluate the removal efficiency of Sb(V) by different types of BCs and MBCs. The material screening experiment was conducted by adding 0.025 g of the adsorbent to 50 mL of 1 mg/L Sb(V) solution, followed by constant temperature shaking for 12 h. The final concentration of Sb(V) was then measured, and calculated the removal efficiency. Based on the preliminary results, the MBC sample named M0.3-S/R(4:1)-BC exhibiting the highest adsorption capacity was selected for subsequent batch adsorption studies. Each experiment was conducted using a thermostatic shaker (ZD-85, Gaoke, China) at 25℃ and 180 rpm for 12 h.

Batch adsorption experiments were systematically executed to examine the influences of adsorbent dosage, pH, co-existing substances, contact time, initial concentration, and temperature. The selected MBC (M0.3-S/R(4:1)-BC) was introduced at varying dosages (0.005 to 0.05 g) into 50 mL of a 1 mg/L Sb(V) solution to ascertain the optimal adsorption dosage. The initial pH of the solution was altered between 3 and 11 using 1 mol/L NaOH and/or HCl to assess pH-dependent adsorption mechanisms. Common ions and pollutants typically present in textile wastewater were utilized as co-existing substances to assess their influence on Sb(V) removal. Specifically, cations (Na+, K+, Ca2+, Mg2+) and anions (Cl-, NO3-, HCO3-, SO42-) with concentrations ranging from 0 to 10 mmol/L; phosphate concentrations were varied from 0 to 5 mg/L; reactive red and disperse orange dyes were tested at concentrations of 0 to 30 mg/L; and humic acid was included at levels of 0 to 15 mg/L. Kinetics experiments involved adding 0.250 g of the selected MBC to 500 mL of Sb(V) working solution at 30, 35, and 40 ℃ while implementing mechanical stirring and interval sampling. Adsorption isotherm studies were conducted by adding 0.025 g of MBC into 50 mL of Sb(V) solution with initial concentrations ranging from 1 to 100 mg/L. Furthermore, the thermodynamics of Sb(V) removal by MBC were studied at 30, 35, and 40 ℃.

After adsorption, all samples were passed through a 0.45 μm filter for quantitative analysis. The concentration of Sb(V) in the supernatant was measured using an inductively coupled plasma-atomic emission spectrometer (ICP-AES, Thermo Fisher Scientific, USA), enabling the calculation of removal efficiency. All adsorption experiments were repeated three times. To assess the adsorption mechanism, the pseudo first-order and pseudo second-order kinetic models,

the Langmuir, and Freundlich isotherm adsorption models and the thermodynamic equations were used in this study.

Pseudo first-order kinetic equation:

Pseudo second-order kinetic equation:

where *t* represents the adsorption time (min), *k*₁ (1/min) and *k*₂ (g·mg/min) are the rate constants for the pseudo first-order and pseudo second-order kinetic models, respectively, while *q*ₜ and *q*ₑ (mg/g) signify the adsorption capacities of the magnetic modified biochar material at time *t* and at equilibrium, respectively.

Langmuir model:

Freundlich model:

Where *K*L(L/mg) represents the Langmuir isotherm constant associated with temperature, *K*F(mg/(g·mg1/n)) denotes the Freundlich isotherm parameter linked to adsorption capacity, *n* represents the constant associated with adsorption intensity, *q*ₘ (mg/g) signifies the maximum monolayer adsorption capacity of the adsorbent, and *C*ₑ (mg/L) is defined as the equilibrium concentration of Sb(V).

Thermodynamic equations：

where *R*=8.314 J/(mol·K), Δ*G* (kJ/mol) signifies the Gibbs free energy, Δ*H* (kJ/mol) indicates the enthalpy, Δ*S* (J/(mol·K)) represents the entropy, *K*d denotes the distribution coefficient, and *q*ₑ (mg/g) and *C*ₑ (mg/L) are defined as the adsorption capacity and equilibrium concentration at equilibrium, respectively.

After M0.3-S/R(4:1)-BC has adsorbed Sb(V) from the aqueous solution, a desorption-regeneration study was performed. The experiment was performed as follows: the MBC loaded with Sb(V) was isolated from the solution using a magnetic field, washed with deionized water, and then soaked in a 0.1 mol/L NaOH solution at 180 rpm for two hours at 25 ℃ to facilitate the desorption of Sb(V). After this 2-hour period, solid-liquid separation was performed to isolate the mixture. The M0.3-S/R(4:1)-BC was extensively rinsed with deionized water until the pH of the rinse reached neutrality. The desorbed M0.3-S/R(4:1)-BC was reintroduced into a 1 mg/L Sb(V) solution and allowed to react for 12 hours, and then the concentration of Sb(V) in the supernatant was measured by ICP-AES. To assess the performance and reusability of M0.3-S/R(4:1)-BC in adsorption applications, this process was repeated five times.

Experiments of Sb(V) removal in the actual wastewater were conducted by adding M0.3-S/R(4:1)-BC into the wastewater of a certain textile company in Zhejiang Province, China. The water quality of the tested was as follows: pH = 6.8, total P (TP) = 0.17 mg/L, COD=153 mg/L, Sb(V) concentration = 0.335 mg/L. Specifically, different masses of M0.3-S/R(4:1)-BC (0.025, 0.050 and 0.100 g) were added into 50 mL of the tested wastewater and stirred at 150 rpm and 298 K for adsorption experiments. After a reaction period of 12 hours, the residual concentrations of Sb(V) were measured for each sample in order to evaluate the Sb removal performance of actual wastewater.
